# Supplementary material for: Dairy Consumption and the Risk of 15-Year Cardiovascular Disease Mortality in a Cohort of Older Australians
Source: Nutrients. 2013 Feb 6;5(2):441–54. doi: 10.3390/nu5020441 (PMC3635204; doi:10.3390/nu5020441)
Supplement: Supplementary File 1 — Supplemental Table (PDF, 77 KB) [file nutrients-05-00441-s001.pdf]

# Supplemental Table

**Table S1.** Food categories used.

| Major Food Group                        | Minor Food Group                 | Foods included                                               | FFQ item ID          |
|-----------------------------------------|----------------------------------|--------------------------------------------------------------|----------------------|
| <i>Vegetables</i>                       |                                  |                                                              |                      |
|                                         | Potatoes                         |                                                              |                      |
|                                         | Low Fat                          | Boiled,mashed,baked                                          | 46,47                |
|                                         | High fat                         | Hot chips                                                    | 48                   |
|                                         | Brassica                         | Cabbage, cauliflower, broccoli and Brussel sprouts, coleslaw | 54, 43, 42, 55, 62   |
|                                         | Leaf and stalk                   | Bean sprouts, celery, lettuce and silverbeet                 | 64, 63, 61, 44       |
|                                         | Peas and Beans                   |                                                              | 52, 53, 50           |
|                                         | Other fruiting vegetables        | Squash, zucchini, eggplant and pumpkin                       | 58, 49               |
|                                         | Carrot and root                  |                                                              | 56, 51               |
|                                         | Tomatoes                         |                                                              | 60                   |
|                                         | Legumes                          | Baked beans, soy, other                                      | 67, 66, 65           |
|                                         | Other vegetables                 | Mushrooms, corn and shallots                                 | 59, 57, 45, 141, 140 |
|                                         | Avocado                          |                                                              | 31                   |
| <i>Cereal and cereal products</i>       |                                  |                                                              |                      |
|                                         | Breakfast cereals                |                                                              | 91, 92               |
|                                         | Bread, white                     |                                                              | 93                   |
|                                         | Bread, mixed grain and wholemeal |                                                              | 94                   |
|                                         | Rice and pasta                   |                                                              | 96, 97, 98           |
| <i>Cereal-based products and dishes</i> |                                  |                                                              |                      |
|                                         | Sweet biscuits                   | Sweet biscuits                                               | 130, 131             |
|                                         | Savoury biscuits                 | Crackers                                                     | 99                   |
|                                         | Cakes, buns, scones              | Scone, pancakes, cakes, bun                                  | 95, 126, 129         |
|                                         | Pastries                         | Sweet pie                                                    | 127, 128             |
|                                         | Mixed dishes                     | Pizza                                                        | 139                  |
| <i>Fruit</i>                            |                                  |                                                              |                      |
|                                         | Citrus fruit                     | Orange, grapefruit                                           | 33, 34               |
|                                         | Tropical fruit                   | Pawpaw, pineapple, mango, banana                             | 27, 28, 29, 35       |
|                                         | Pomme fruit                      | Pear, apple                                                  | 32                   |

Table S1. Cont.

|                                |                                 |                                                     |                              |
|--------------------------------|---------------------------------|-----------------------------------------------------|------------------------------|
|                                | Berry fruit                     | Strawberry, raspberry, blueberry                    | 24, 25                       |
|                                | Stone fruit                     | Peach, plum, apricot, nectarine                     | 22                           |
|                                | Dried fruit                     | Prune, apricot, sultana, raisin, peach              | 36, 37, 38, 39               |
|                                | Canned fruit                    | Fruit salad, apricot, peach, canned                 | 40, 41                       |
|                                | Other fruit <sup>e</sup>        | Rockmelon, watermelon, grapes                       | 23, 26, 30                   |
| <b>Non-alcoholic beverages</b> |                                 |                                                     |                              |
|                                | Tea                             |                                                     | 117, 118                     |
|                                | Coffee                          |                                                     | 115, 116                     |
|                                | Juices                          |                                                     | 104, 105, 106, 107, 108, 109 |
|                                | Cordials                        |                                                     | 114                          |
|                                | Soft drinks                     |                                                     | 112, 113                     |
|                                | Artificially sweetened drinks   | Low calorie soft drink                              | 110, 111                     |
| <b>Dairy Products</b>          |                                 |                                                     |                              |
| Low/reduced fat dairy          | Milk, reduced fat and low fat   |                                                     | 6, 7                         |
|                                | Reduced fat dairy dessert       | Low fat yoghurt                                     | 12                           |
|                                | Cheese, low fat                 | Cottage and ricotta cheese                          | 13                           |
| Regular fat dairy              | Milk, regular                   |                                                     | 8                            |
|                                | Medium fat dairy dessert        | Custards and yoghurts                               | 11, 125                      |
|                                | Cheese, regular                 | Cheddar cheeses                                     | 14                           |
| <b>Meat</b>                    |                                 |                                                     |                              |
| Red Meat                       | Moderately-lean red meat cuts   | Beef/pork/lamb trimmed                              | 468                          |
|                                | Moderately-lean red meat dishes | Lamb stew, Beef stew, Hamburger patty, Beef rissole | 69, 69, 74,                  |
|                                | Medium fat red meat cuts        | Beef/pork/lamb partly trimmed                       | 368                          |
|                                | Medium fat red meat dishes      | Bolognaise sauce, Mince                             | 75, 76                       |
|                                | High fat red meat cuts          | Beef/pork/lamb not trimmed                          | 268                          |
|                                | High fat red meat dishes        | Sausages, meat pie, sausage roll                    | 73, 79, 80                   |

Table S1. Cont.

|                                  |                            |                                                |                |
|----------------------------------|----------------------------|------------------------------------------------|----------------|
| Processed meat                   |                            | Ham, bacon, luncheon meat, frankfurter         | 70, 77, 81, 82 |
| Organ meat                       |                            | Liver                                          | 78,            |
| Chicken                          | Moderately-lean chicken    |                                                | 72             |
|                                  | High fat chicken           |                                                | 71             |
| <b>Eggs</b>                      | Low fat eggs               | Egg, poached, hard-boiled                      | 83             |
|                                  | Moderately fat eggs        | Egg, scrambled, omelette, fried                | 84, 85         |
| <b>Fish</b>                      | Seafood                    | Prawn, scallop, crab                           | 90             |
|                                  | Low fat canned fish        | Salmon, tuna in brine                          | 87             |
|                                  | Moderately fat canned fish | Tuna, sardine in oil                           | 86, 88         |
|                                  | Medium fat fish            | Fish, other types                              | 89             |
| <b>Nuts</b>                      |                            | Peanut, pecan, walnut, almond, peanut butter   | 135, 137       |
| <b>Fats</b>                      |                            |                                                |                |
|                                  | Butter                     |                                                | 16             |
|                                  | Margarine                  |                                                | 15             |
|                                  | Oils                       |                                                | 160,161        |
|                                  | Cooking fat                |                                                | 162            |
| <b>Yeast/Beef extracts</b>       |                            | Vegemite, marmite                              | 136            |
| <b>Alcoholic beverages</b>       | Beer                       | Regular and reduced alcohol beer               | 119, 120       |
|                                  | Wine                       | Red, white and fortified wines                 | 121, 122, 123  |
|                                  | Spirits                    |                                                | 124            |
| <b>Confectionary</b>             |                            | Lollies, chocolate                             | 132, 133       |
| <b>Sugar products and dishes</b> |                            | Sugar, honey, jams, syrups                     | 134, 156       |
| <b>Snack foods</b>               |                            | Chips                                          | 138            |
| <b>Savoury sauces</b>            |                            | French dressing, coleslaw dressing, mayonnaise | 142, 143       |
